# Supplementary material for: Coxiella burnetii Antibody Prevalence and Risk Factors of Infection in the Human Population of Estonia
Source: PubMed Central journal article supplement (PMC6956122; doi:10.3390/microorganisms7120629), 2019-11-29
Supplement: microorganisms-07-00629-s001.pdf [file microorganisms-07-00629-s001.pdf]

1 **Supplementary materials**

2

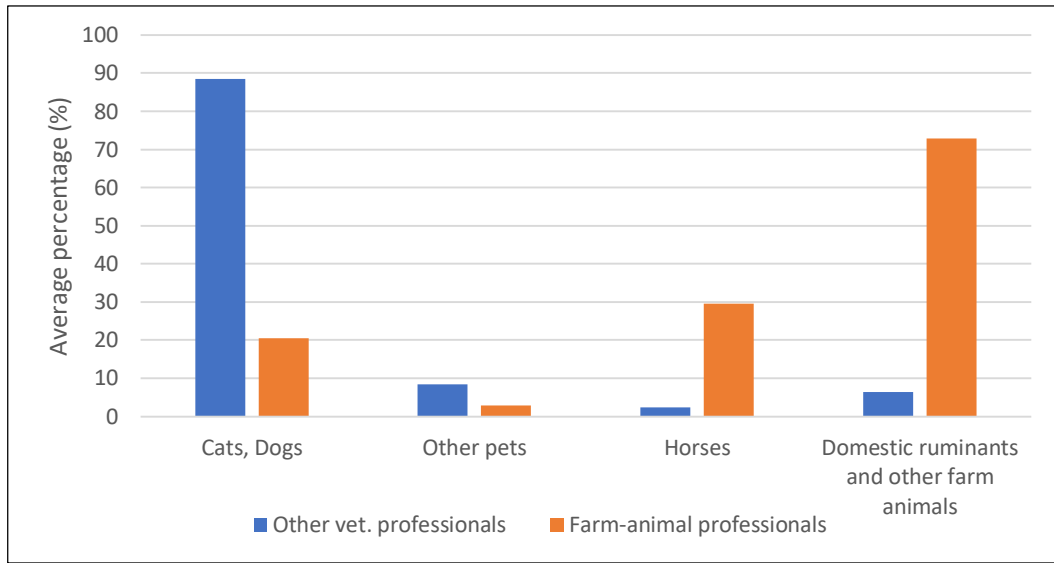

3

4 **Figure S1.** Average proportions of animal patients handled by farm-animal and other veterinarians.

5

**Table S1.** Descriptive characteristics of *Coxiella burnetii* Phase 2 IgG ELISA and Q Fever IFA IgG test results.

| Test result               | Total<br>N | Optical density (OD) |         |                 | OD quartiles |       |       |
|---------------------------|------------|----------------------|---------|-----------------|--------------|-------|-------|
|                           |            | Min.                 | Max.    | Mean            | Lower        | Upper | Range |
| ELISA+ <sup>7</sup> /IFA+ | 57         | 0.386                | 2.087   | 0.583           | 0.504        | 0,760 | 0.256 |
| ELISA+/IFA- <sup>8</sup>  | 1          | 0.525                |         | NA <sup>9</sup> | NA           | NA    | NA    |
| ELISA-/IFA+               | 19         | 0.382                | 0.502   | 0.434           | 0.395        | 0.441 | 0.046 |
| ELISA-/IFA-               | 7          | 0.382                | 0.447   | 0.397           | 0.390        | 0.406 | 0.016 |
| ELISA-                    | 1460       | 0.061                | 0.394** | 0.126           | 0.095        | 0.185 | 0.090 |
| ELISA-/IFA-*              | 12         | 0.051                | 0.091   | 0.069           | 0.059        | 0.085 | 0.026 |

6

<sup>7</sup> + – positive test result

7

<sup>8</sup> - - negative test result

8

<sup>9</sup> NA – not applicable

9

\* ELISA test results with low OD value tested with IFA for inside validation

10

\*\* single sample missed by mistake

11

12
